# Supplementary material
Source: PubMed Central journal article supplement (PMC8380725)

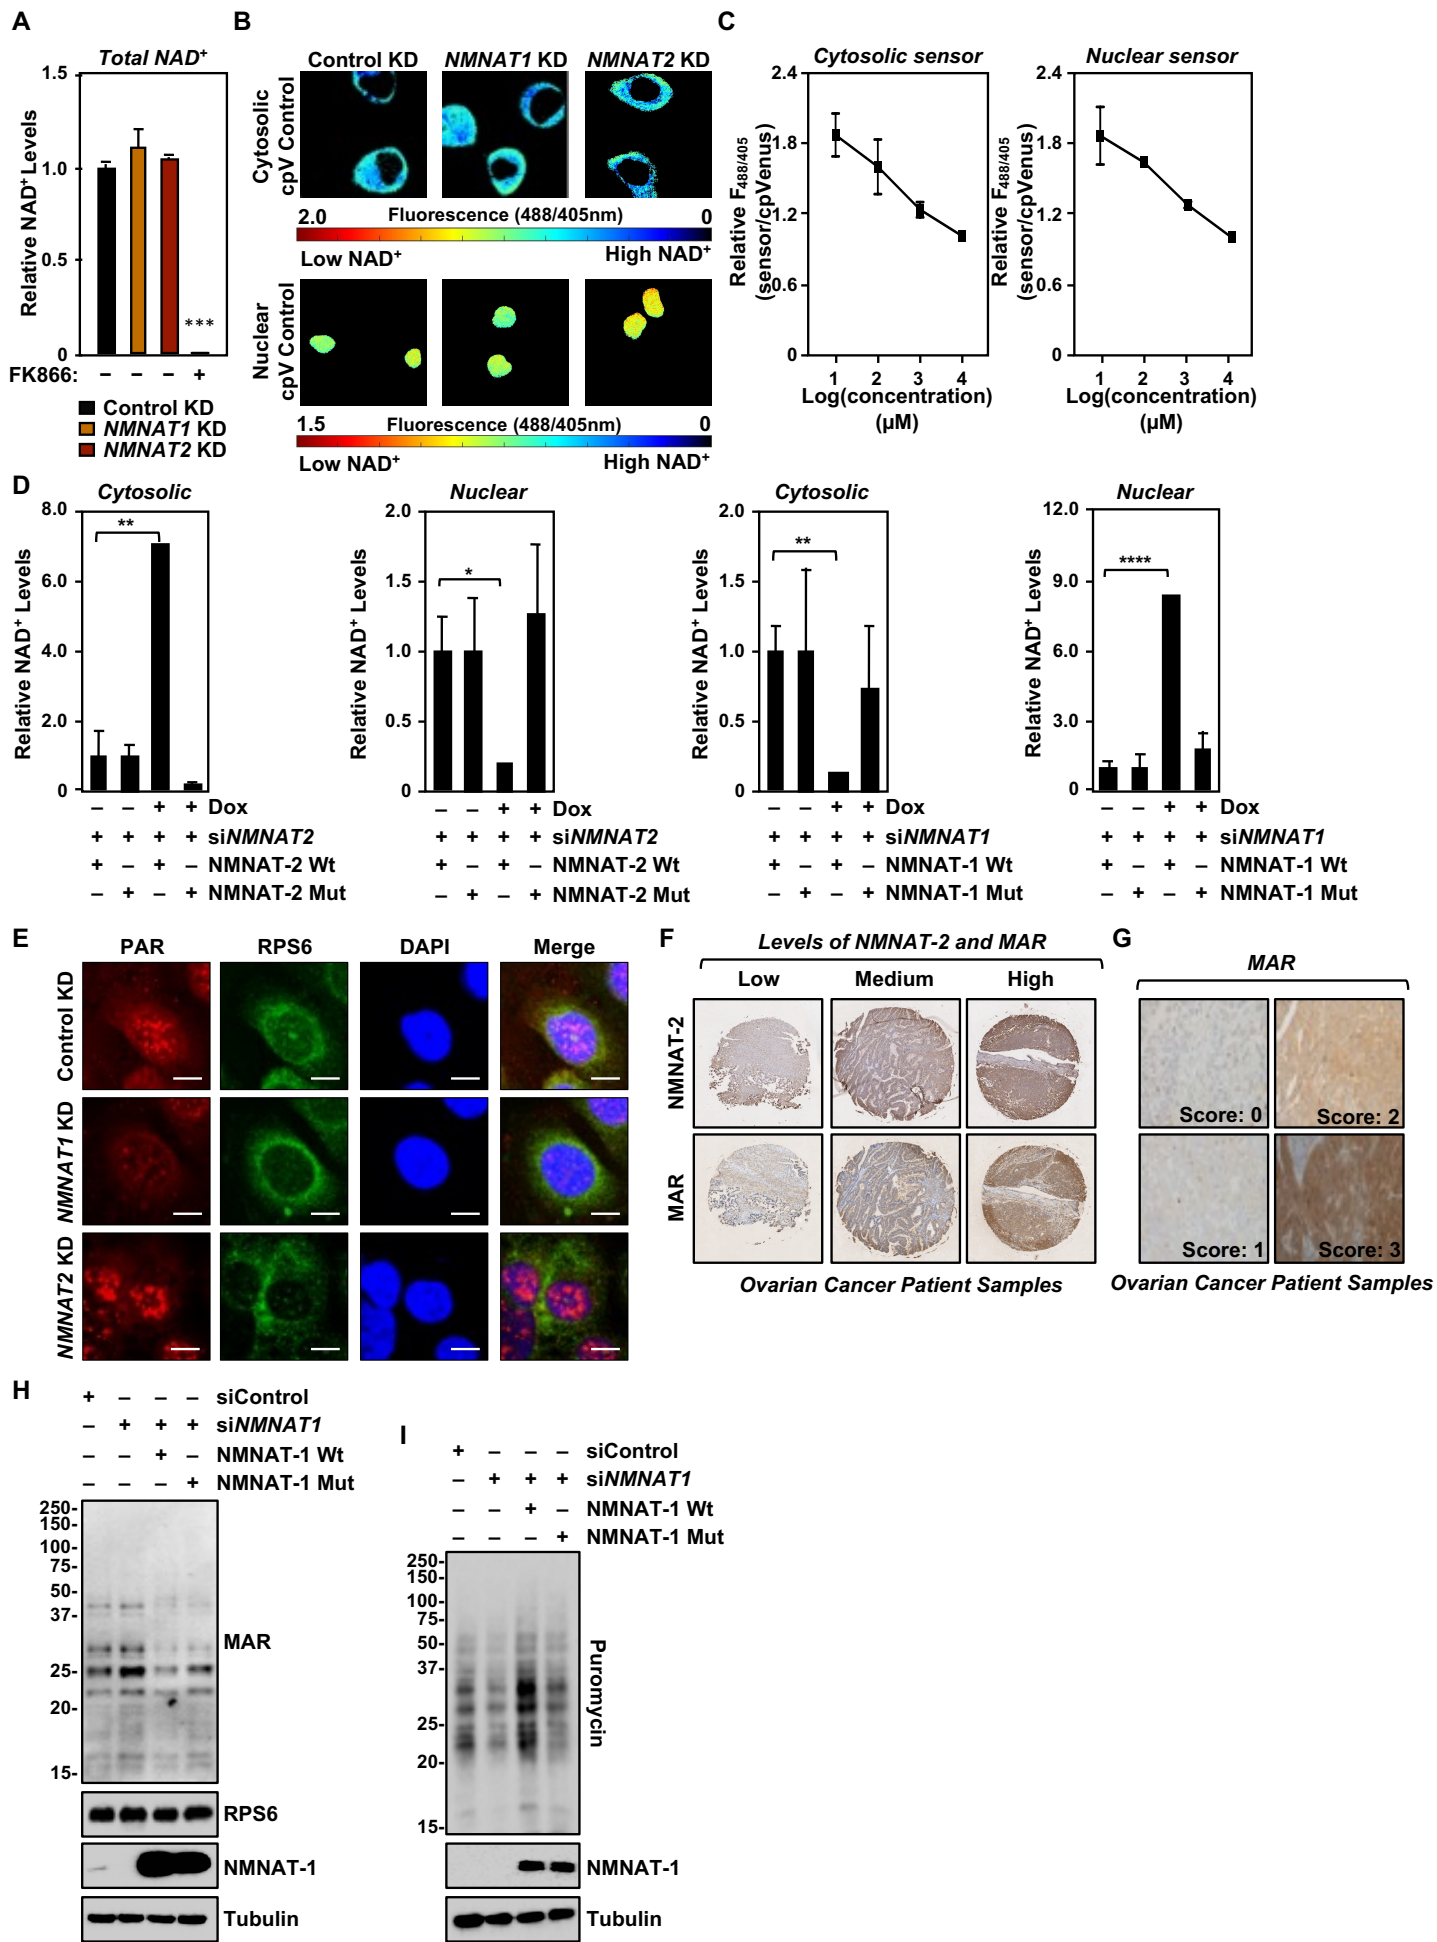

Fig. S1 - Challa et al. (2021)

Supplement: NIHMS1726122-supplement-2.pdf [file NIHMS1726122-supplement-2.pdf]

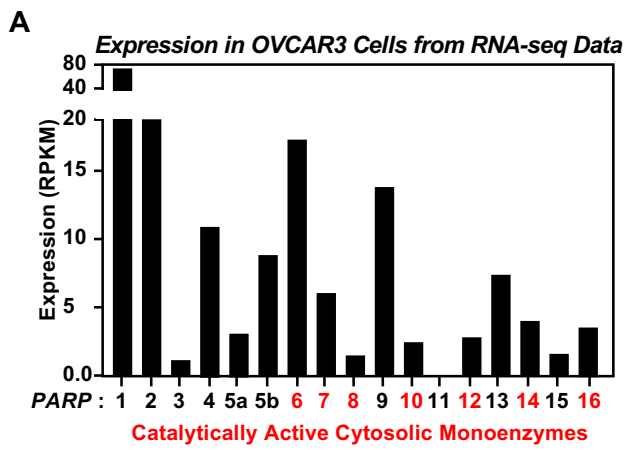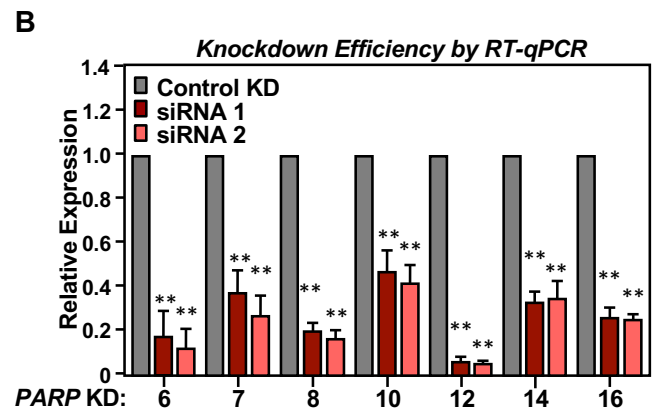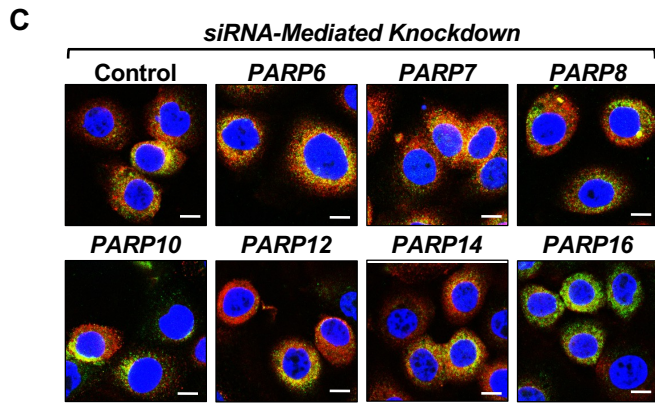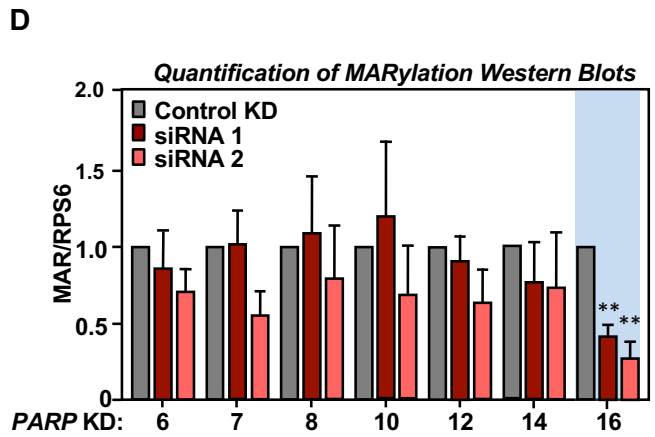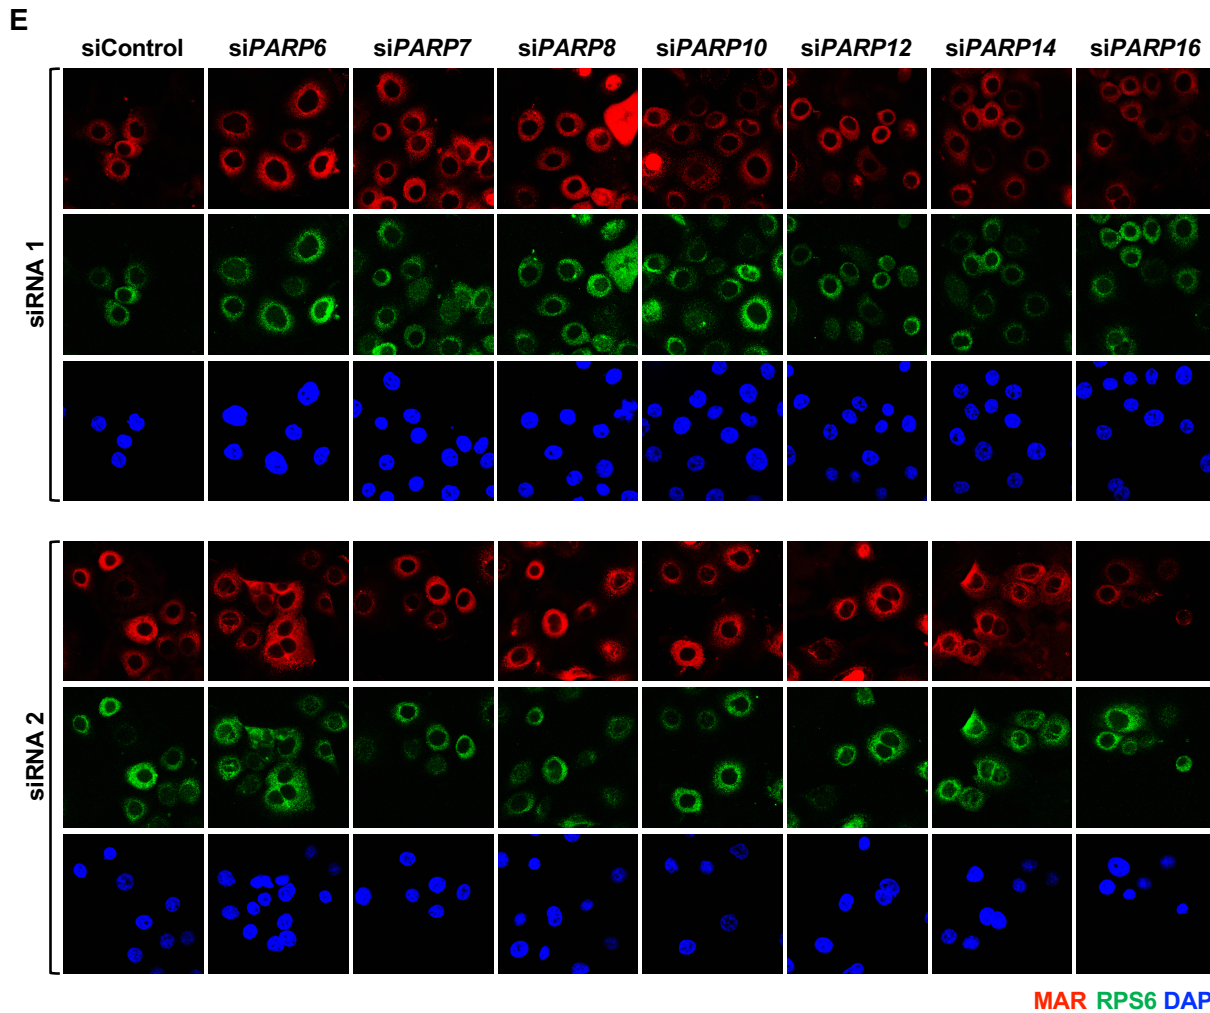

Fig. S2 - Challa et al. (2021)

Supplement: NIHMS1726122-supplement-3.pdf [file NIHMS1726122-supplement-3.pdf]

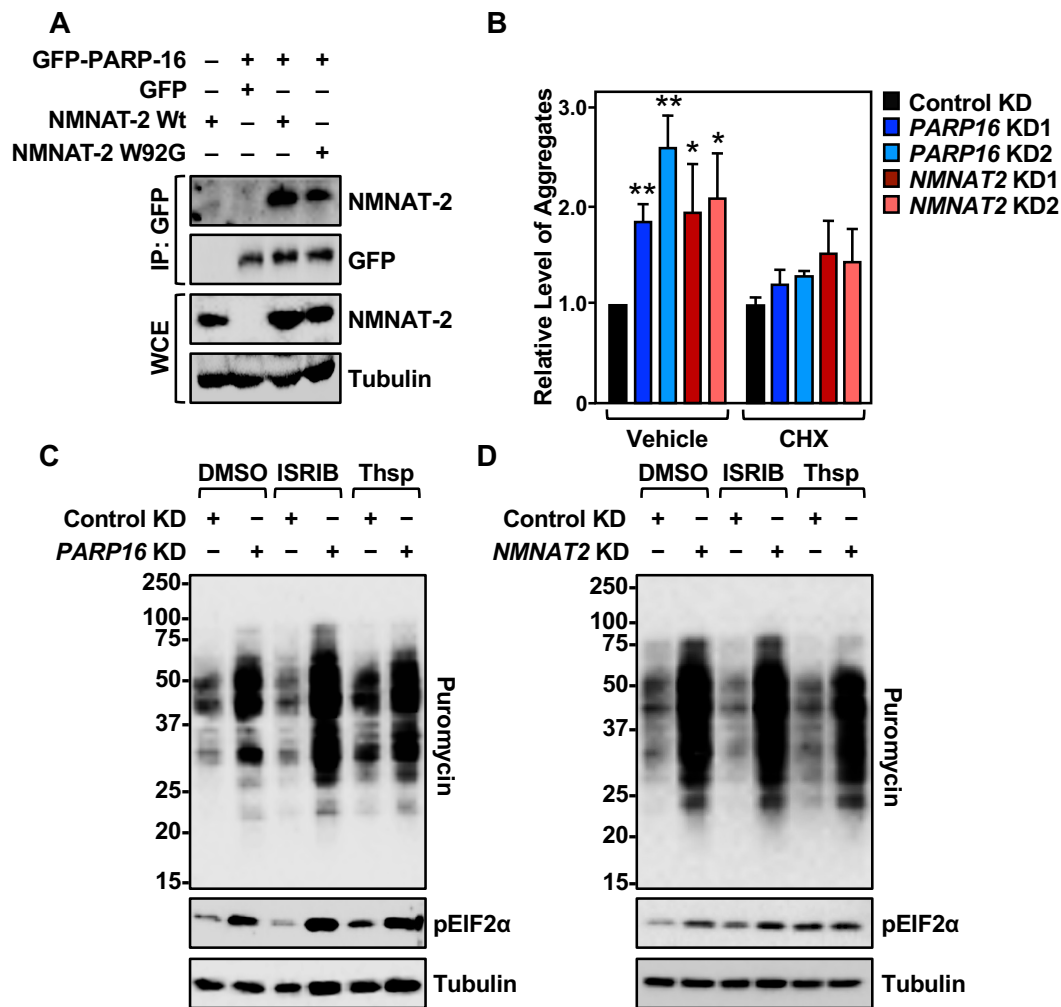

Fig. S3 - Challa et al. (2021)

Supplement: NIHMS1726122-supplement-4.pdf [file NIHMS1726122-supplement-4.pdf]

OVCAR4 Cells

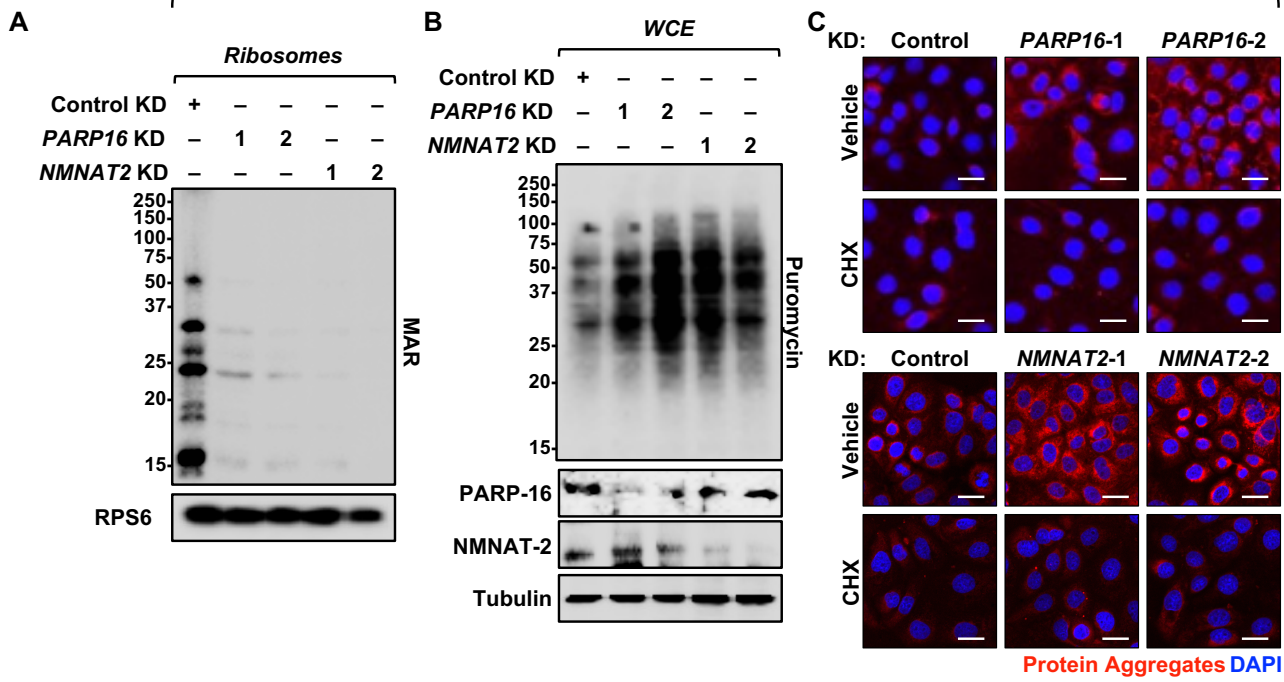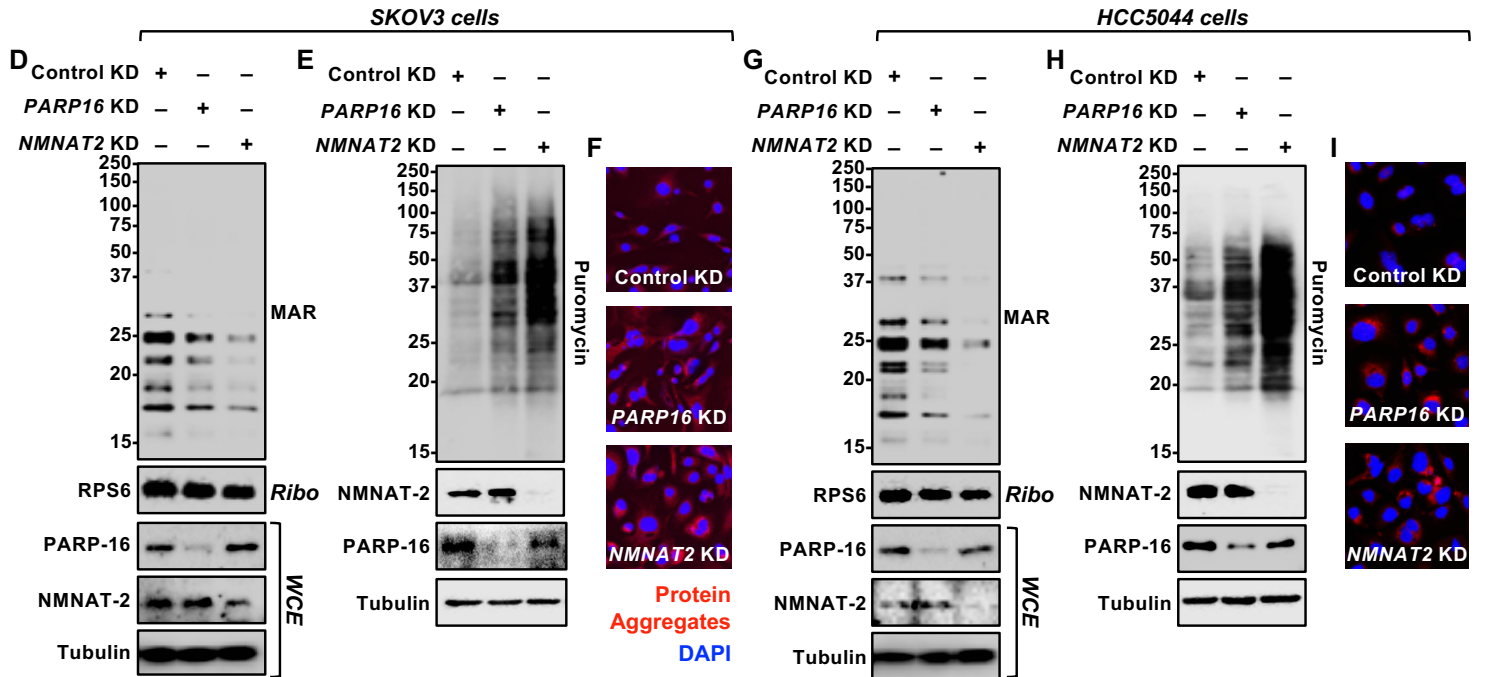

SH-SY5Y Cells (Dox-inducible KD)

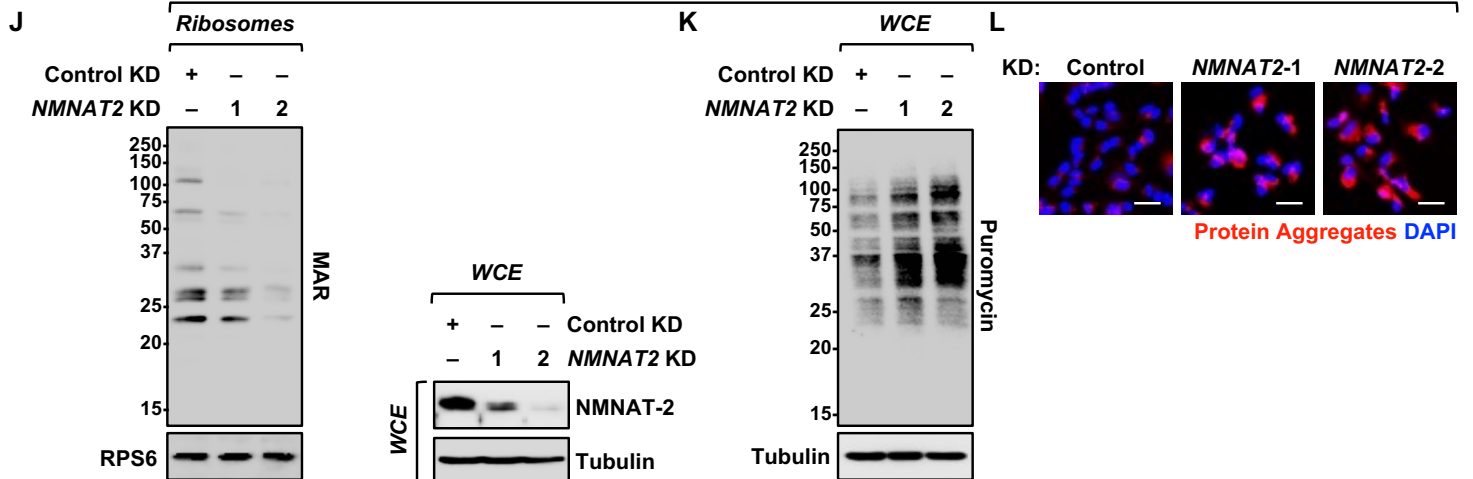

Fig. S4 - Challa et al. (2021)

Supplement: NIHMS1726122-supplement-5.pdf [file NIHMS1726122-supplement-5.pdf]

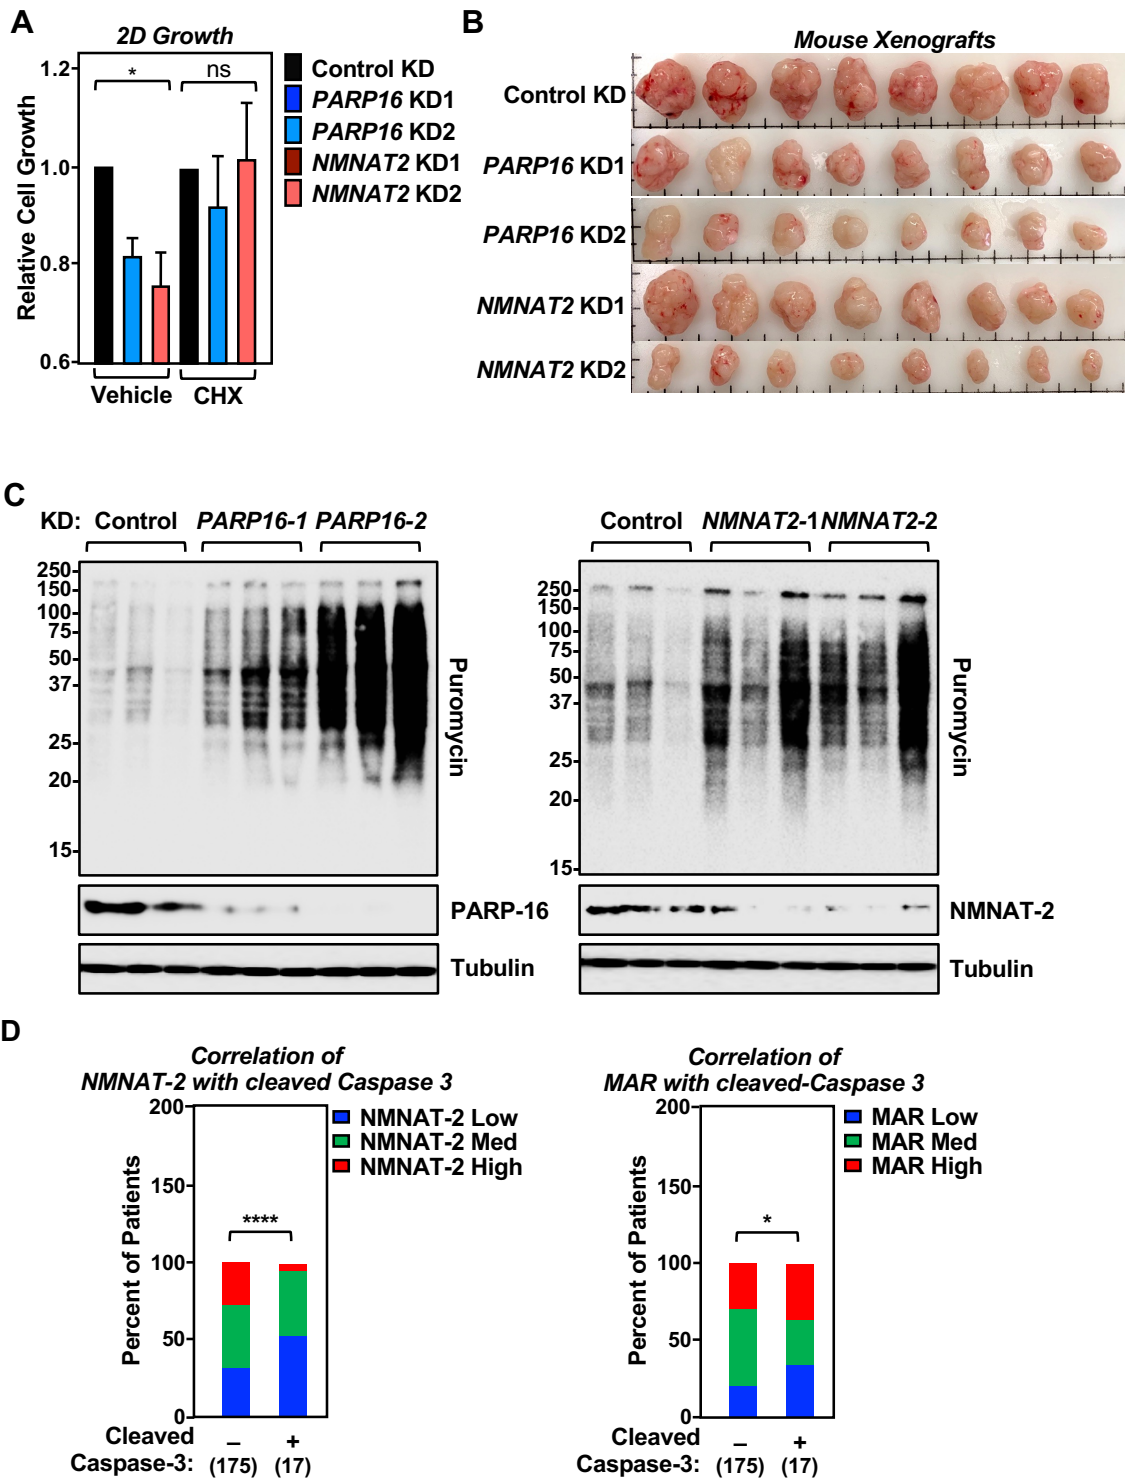

Fig. S5 - Challa et al. (2021)

Supplement: NIHMS1726122-supplement-6.pdf [file NIHMS1726122-supplement-6.pdf]

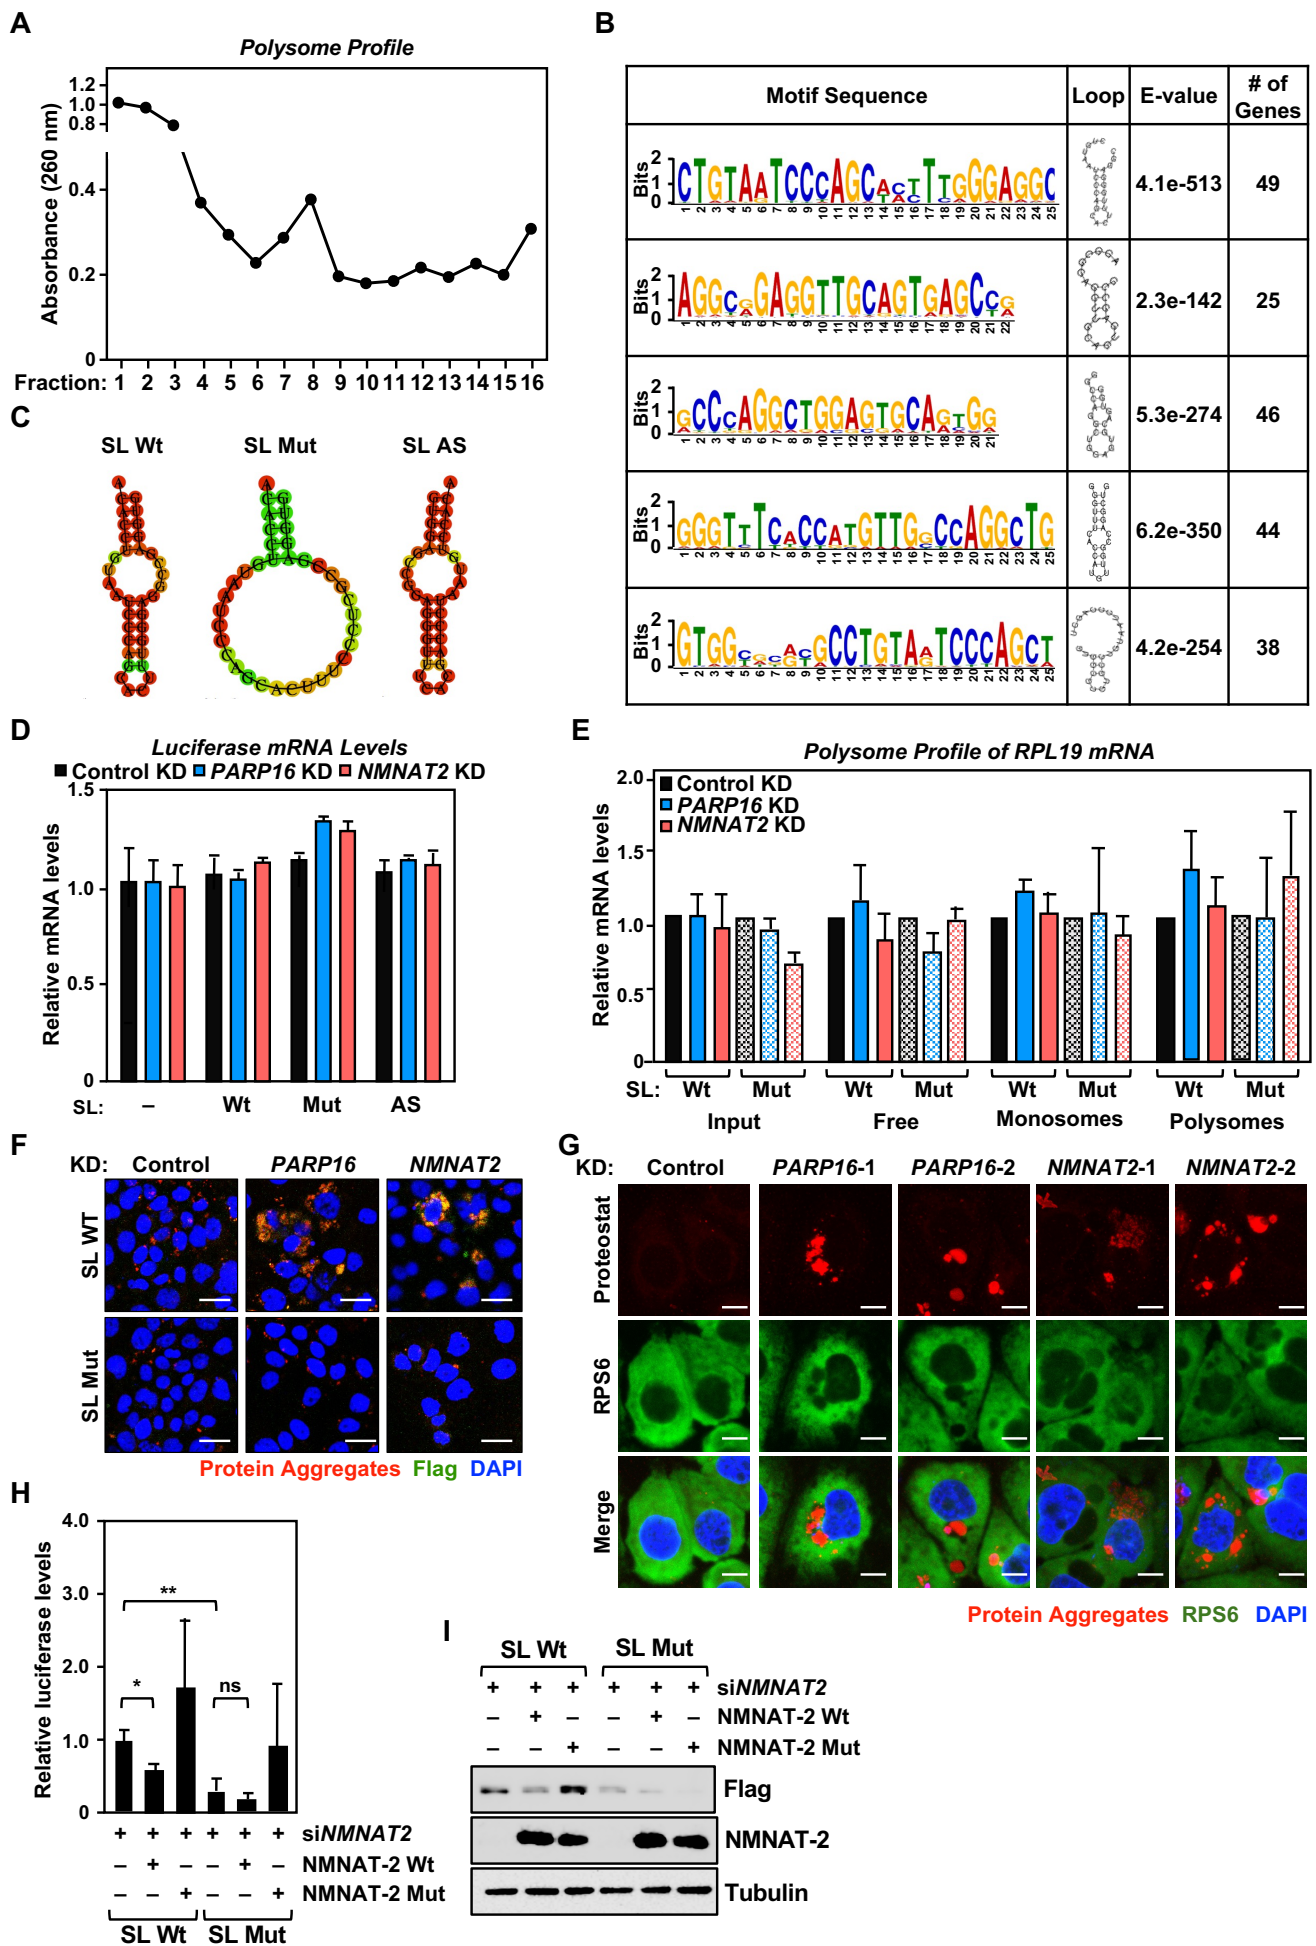

Fig. S6 - Challa et al. (2021)

Supplement: NIHMS1726122-supplement-7.pdf [file NIHMS1726122-supplement-7.pdf]

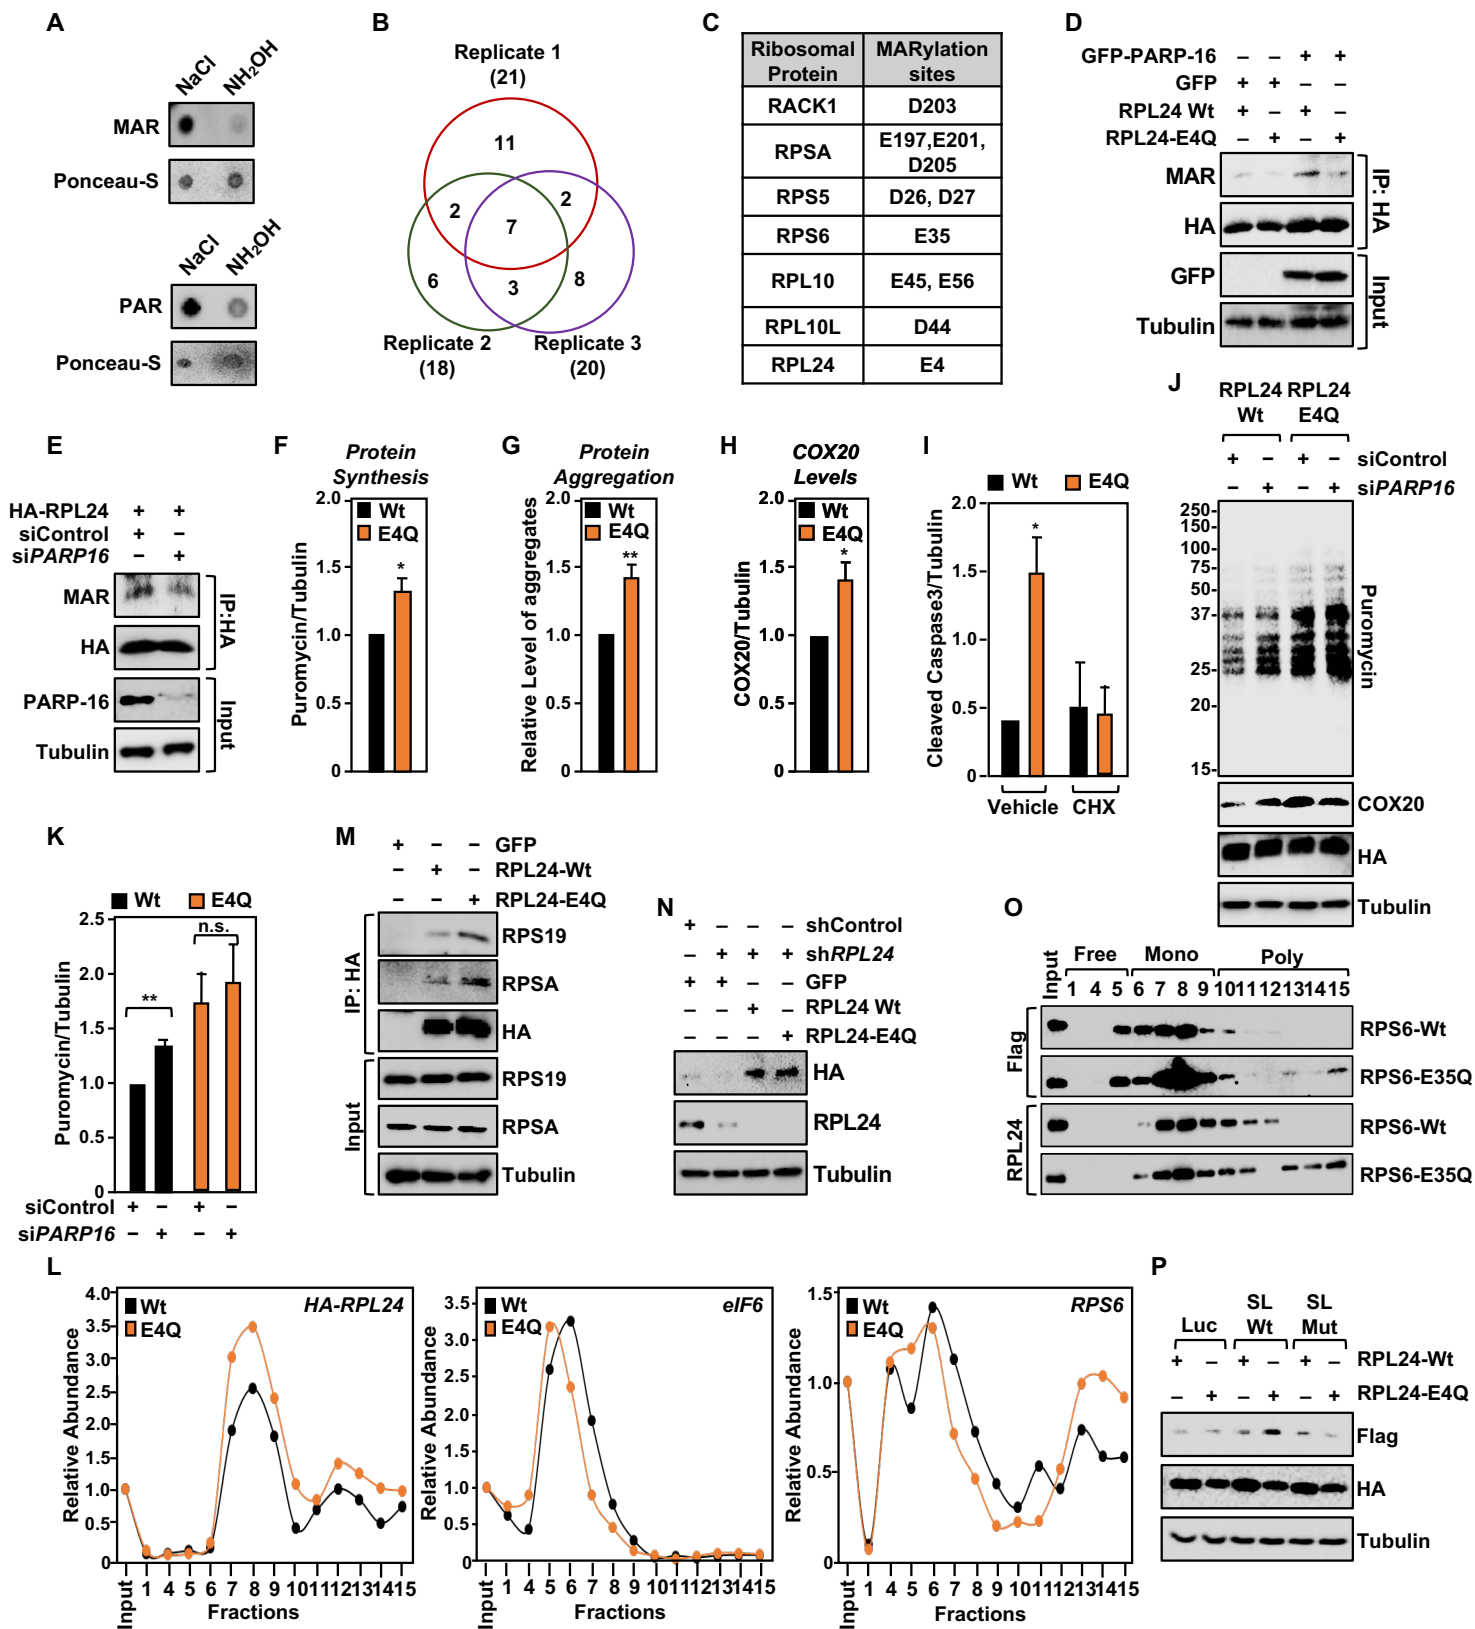

Fig. S7 - Challa et al. (2021)

Supplement: NIHMS1726122-supplement-8.pdf [file NIHMS1726122-supplement-8.pdf]
